# Supplementary material for: Mannose-6-Phosphate Isomerase Functional Status Shapes a Rearrangement in the Proteome and Degradome of Mannose-Treated Melanoma Cells
Source: PubMed Central journal article supplement (PMC11536439; doi:10.1021/acs.jproteome.4c00705), 2024-10-18
Supplement: pr4c00705_si_003.pdf [file pr4c00705_si_003.pdf]

# SUPPORTING INFORMATION

## Mannose-6-phosphate isomerase functional status shapes a rearrangement in the proteome and degradome of mannose-treated melanoma cells

Nathália de Vasconcellos Racorti<sup>1,†</sup>, Matheus Martinelli<sup>1,†</sup>, Silvina Odete Bustos<sup>2</sup>, Murilo Salardani<sup>1</sup>, Maurício Frota Camacho<sup>1</sup>, Uilla Barcick<sup>1</sup>, Luis Roberto Fonseca Lima<sup>1</sup>, Letícia Dias Lima Jedlicka<sup>1,3</sup>, Claudia Barbosa Ladeira de Campos<sup>4</sup>, Richard Hemmi Valente<sup>5</sup>, Roger Chammas<sup>2,6</sup>, André Zelanis<sup>1,\*</sup>

<sup>1</sup>Functional Proteomics Laboratory, Federal University of São Paulo – UNIFESP, São José dos Campos, São Paulo, Brazil;

<sup>2</sup>Grupo de Oncologia Experimental - Instituto do Câncer do Estado de São Paulo – ICESP, São Paulo – SP, Brazil;

<sup>3</sup>Instituto de Estudos em Saúde e Biológicas, Universidade Federal do Sul e Sudeste do Pará- Unifesspa, Marabá-PA, Brazil;

<sup>4</sup>Laboratory of Biochemistry and Molecular and Cellular Biology of Fungi, Federal University of São Paulo – UNIFESP, São José dos Campos, São Paulo, Brazil.

<sup>5</sup>Laboratory of Toxinology, Center for Research, Innovation, and Surveillance in COVID-19 and Health Emergencies, FIOCRUZ, Rio de Janeiro, Brazil;

<sup>6</sup>Faculdade de Medicina da Universidade de São Paulo, São Paulo, Brazil.

†These authors contributed equally to this work

\*Corresponding author:

André Zelanis  
andre.zelanis@unifesp.br  
Functional proteomics Laboratory  
Department of Science and Technology  
Federal University of São Paulo (ICT-UNIFESP)  
São José dos Campos, São Paulo, Brazil  
Rua Talim, 330, Room 202, 12231-280;  
Tel +55 11 3385-4135 ext. 9727.

## Table of contents

| Content                                                                                                        | Page |
|----------------------------------------------------------------------------------------------------------------|------|
| Figure S1. Expression profile of MPI gene and PMI protein accross distinct tissues/skin cancer cell lines..... | S3   |
| Figure S2. Reproducibility of protein quantitation values between the three biological replicates.....         | S4   |
| Figure S3. Protein content in each cell line/expermental condition.....                                        | S5   |
| Figure S4. Biological pathways of substrates identified by TAILS analysis.....                                 | S6   |
| Figure S5. Mannose-induced cell death evaluated by flow cytometry.....                                         | S7   |

**A**

Bulk tissue gene expression for MPI (ENSG00000178802.17)

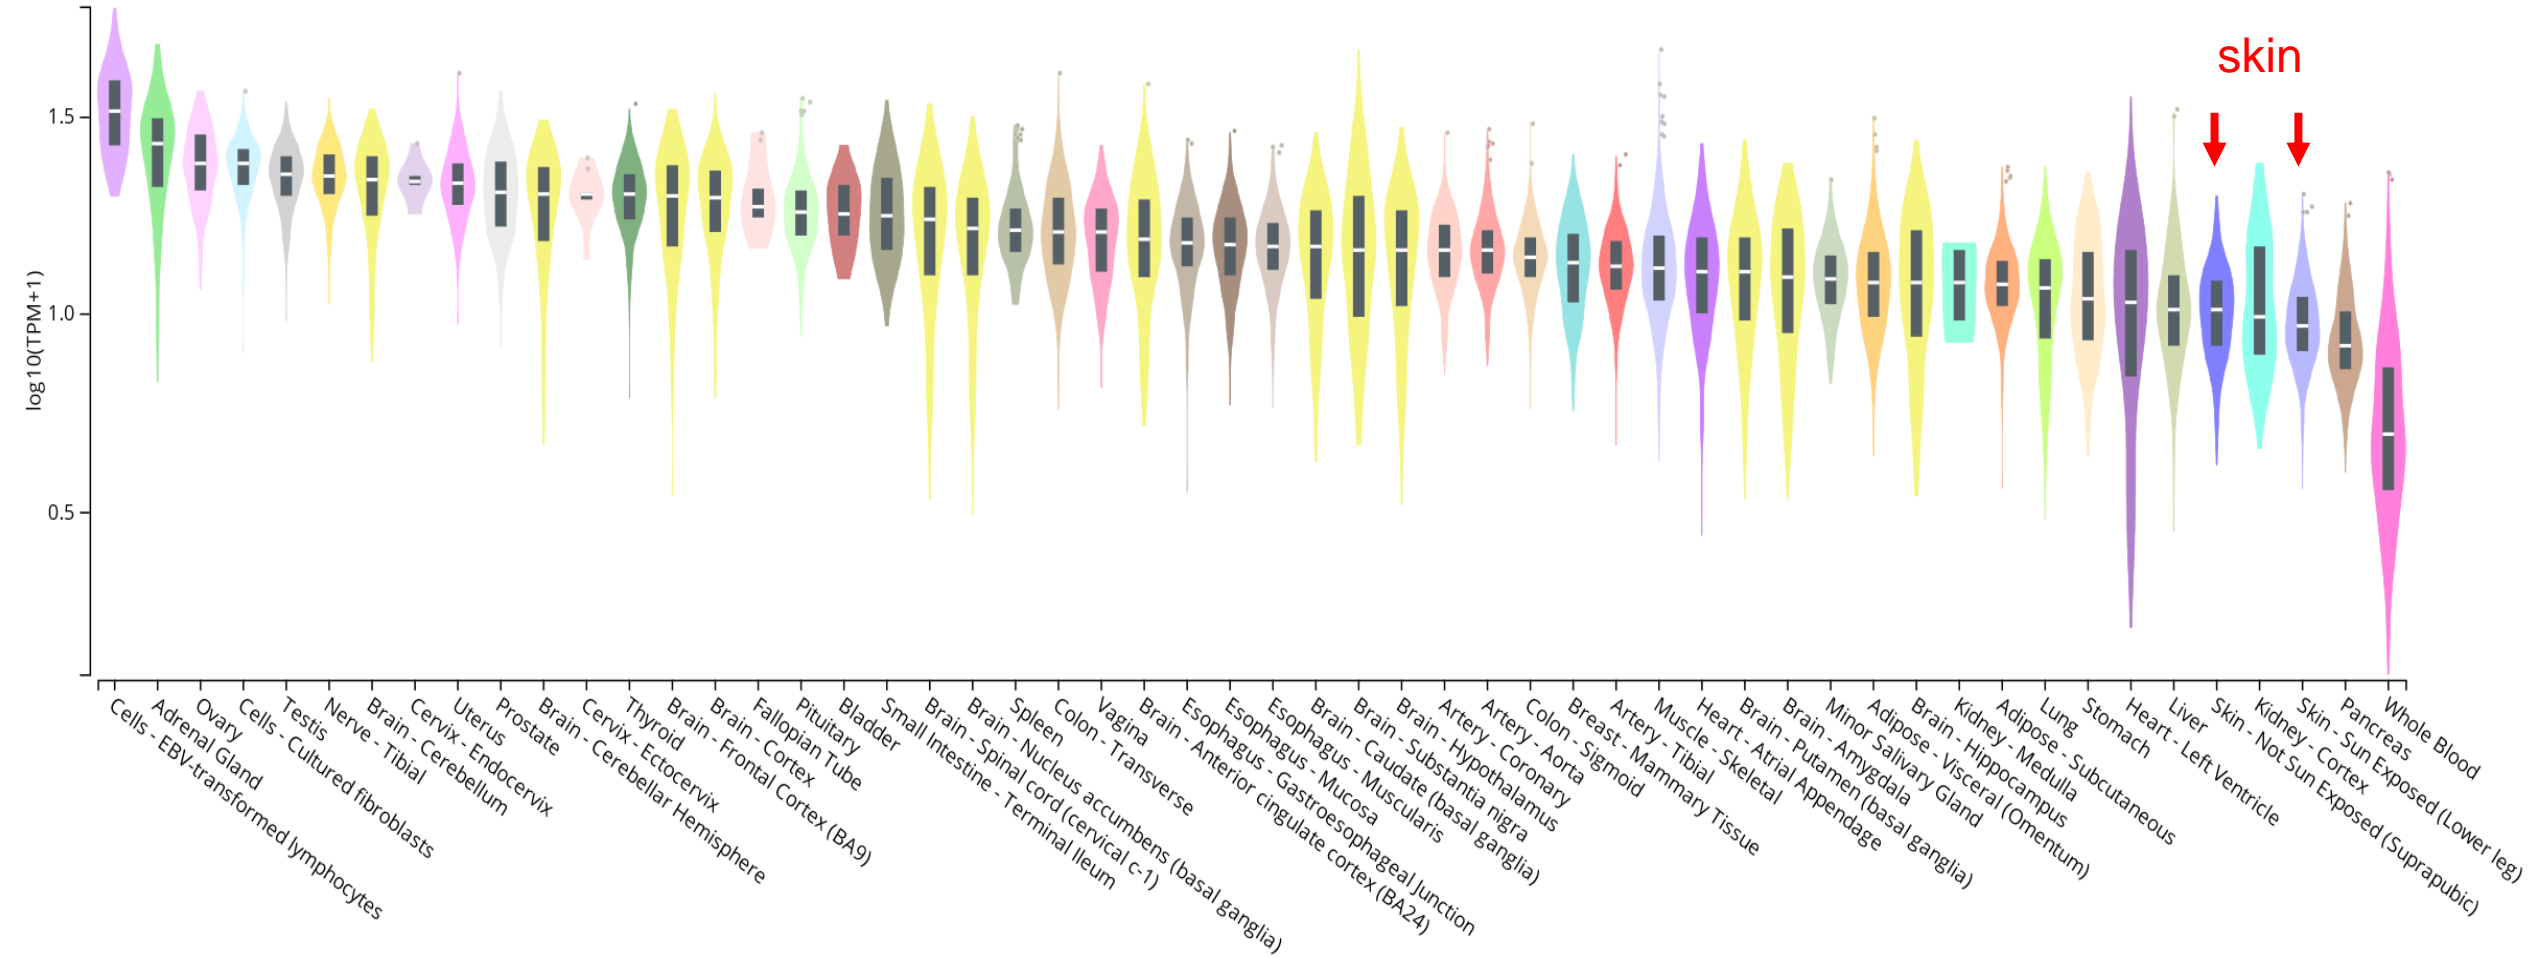

**B**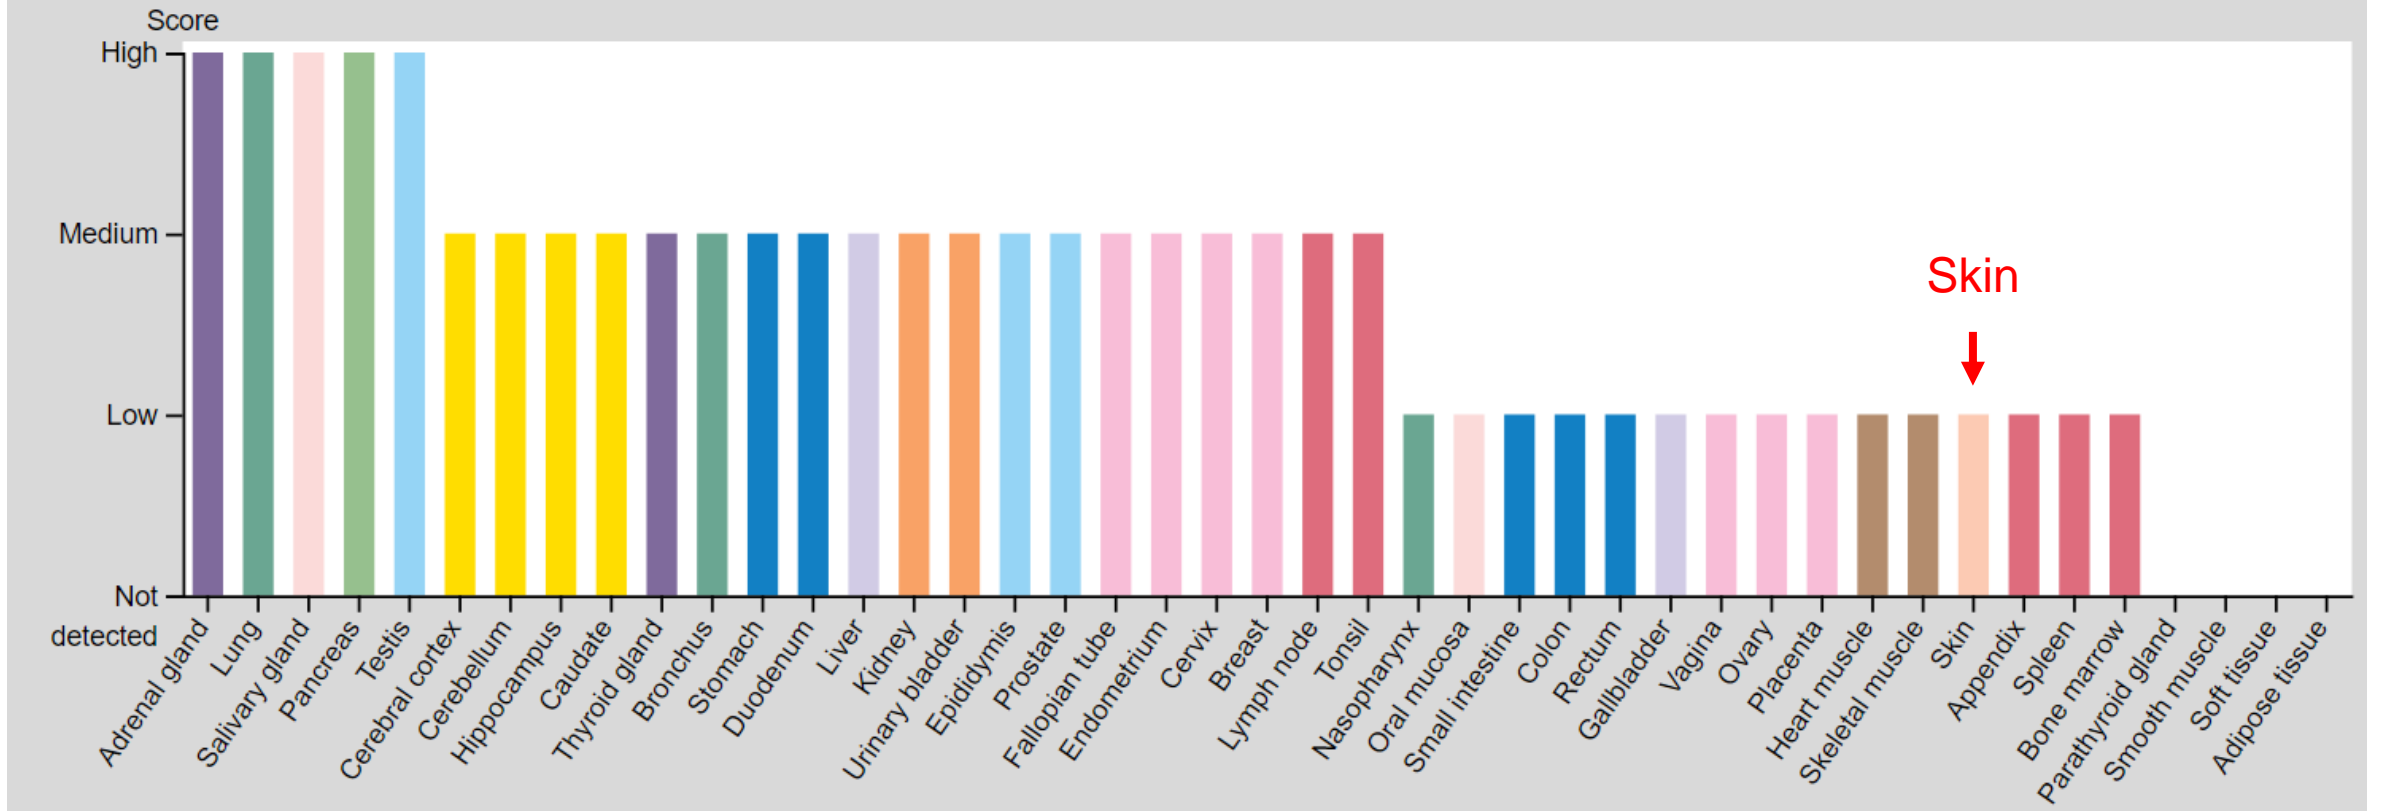

**C**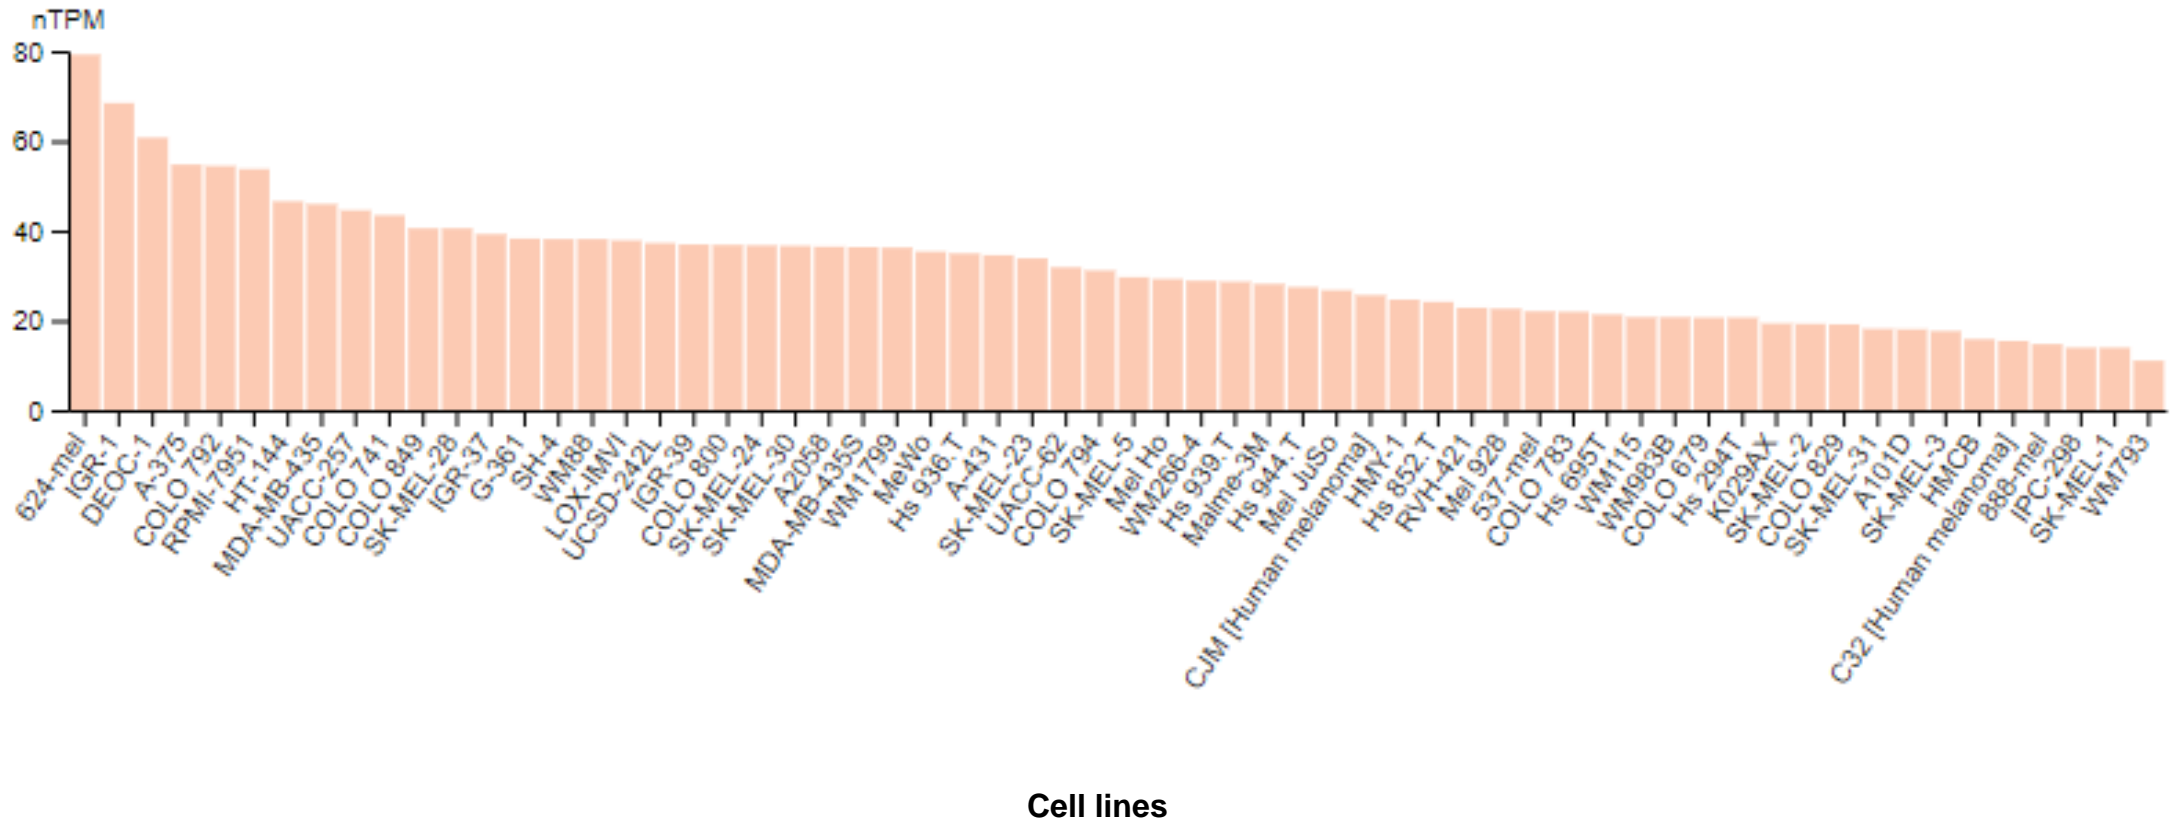

**Figure S1: Expression profile of MPI gene and PMI protein. (A)** Expression profiles of MPI gene across distinct tissues. Data were retrieved from Genotype-Tissue Expression (GTEx), a public repository on tissue-specific gene expression and regulation (<https://www.gtexportal.org/home/gene/MPI>). **(B)** Expression profiles of PMI protein across distinct tissues. Data were retrieved from the Human Protein Atlas (<https://www.proteinatlas.org/ENSG00000178802-MPI/tissue>). **(C)** Expression profiles of MPI gene (Transcripts per milion – TPM) across distinct skin cancer cell lines. Data were retrieved from the Human Protein Atlas (<https://www.proteinatlas.org/ENSG00000178802-MPI/cell+line>).

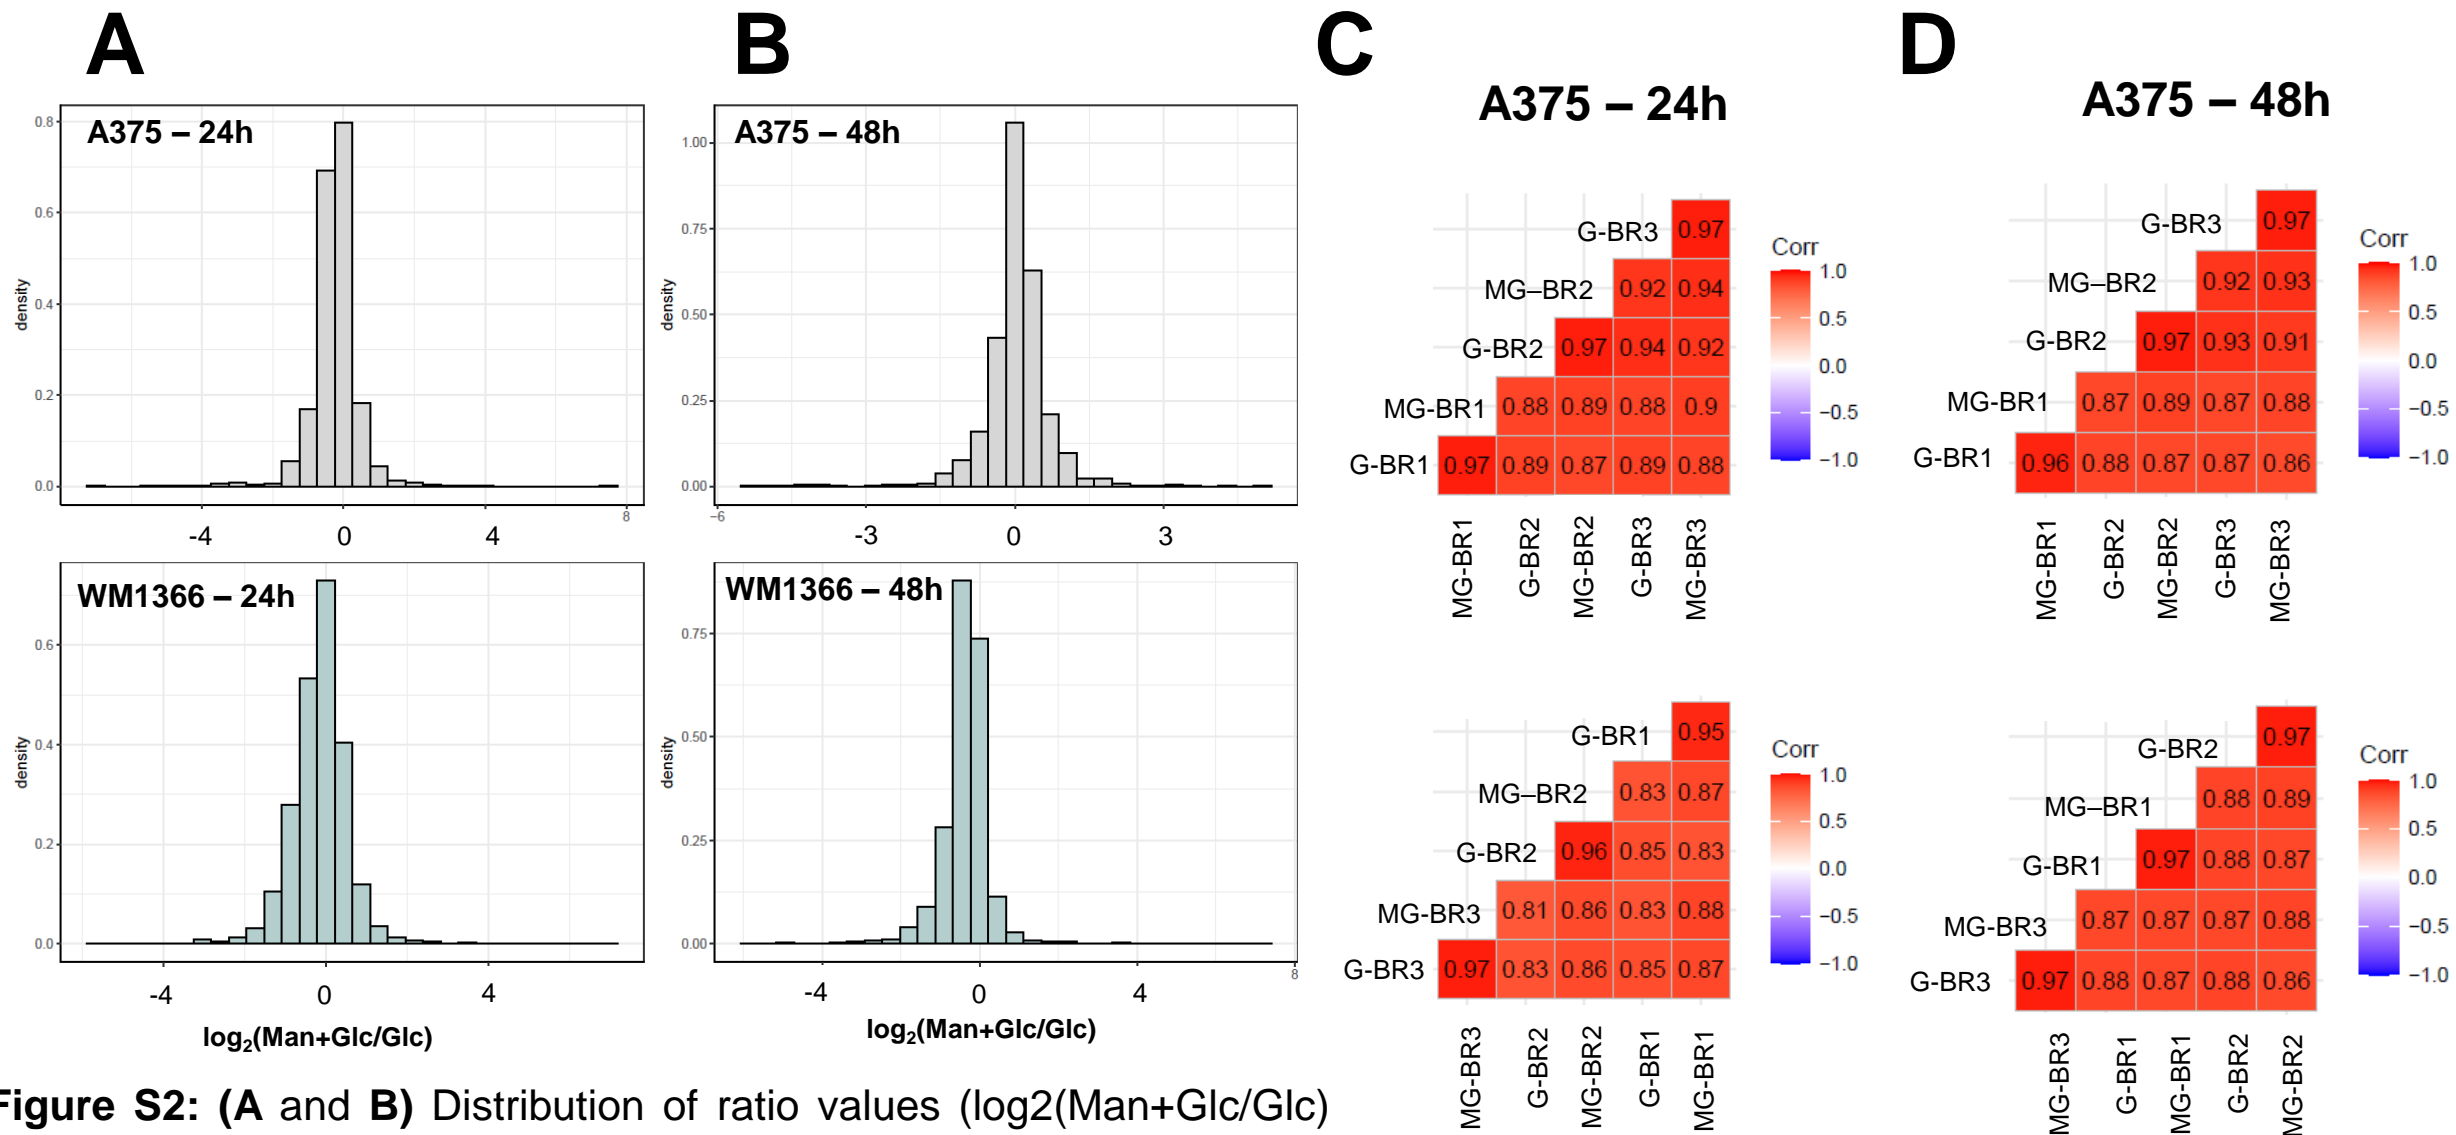

**Figure S2: (A and B)** Distribution of ratio values ( $\log_2(\text{Man}+\text{Glc}/\text{Glc})$ ) for the dimethyl labeling experiment, for each cell line/experimental condition. **(C)** and **(D)** Correlation plots, showing the reproducibility of protein quantitation values ( $\log_2$  (intensity L or H)) between the three biological replicates for each cell line and their corresponding Pearson correlation coefficients.

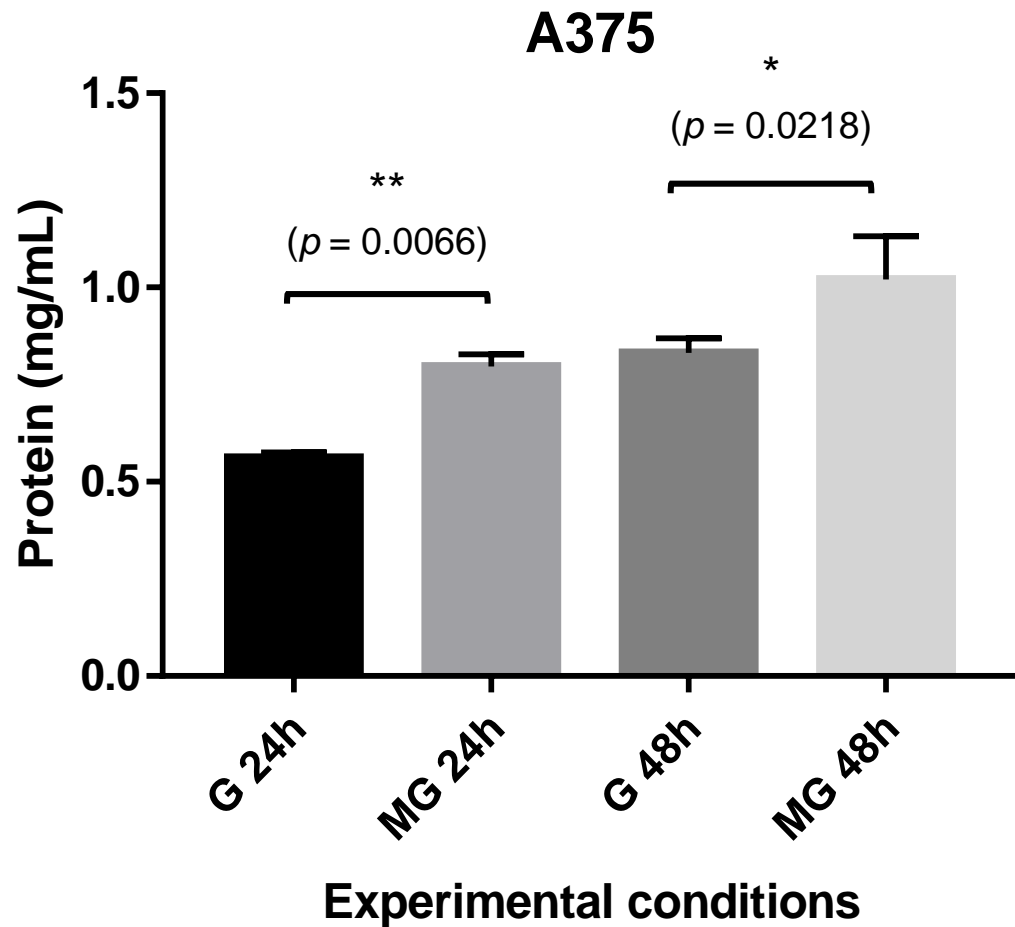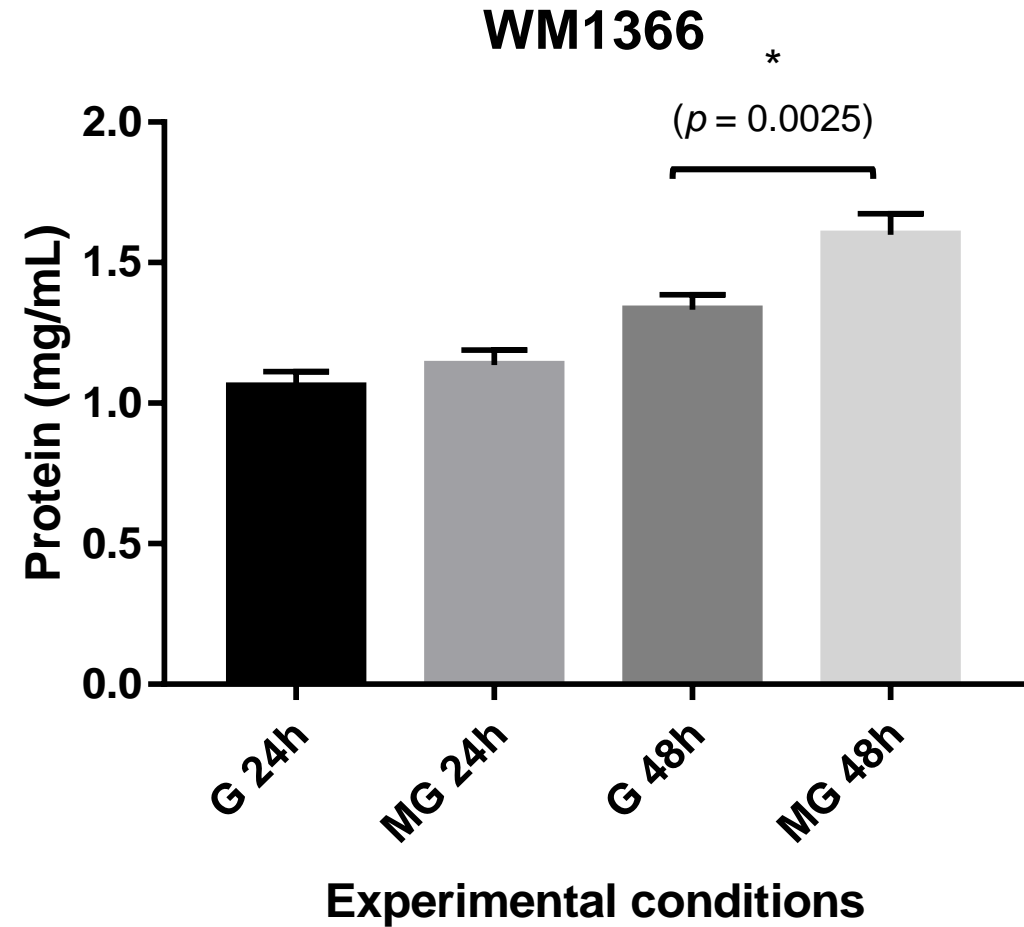

**Figure S3:** Protein content (measured by Bradford method) in each cell line/experimental condition. Statistical analysis (t-test) between each time point (24h or 48h) was performed in GraphPad Prism 9.

**G** = Glucose (25 mM)  
**MG** = Glucose + Mannose (25 mM final)

**A375**

**Biological pathways**

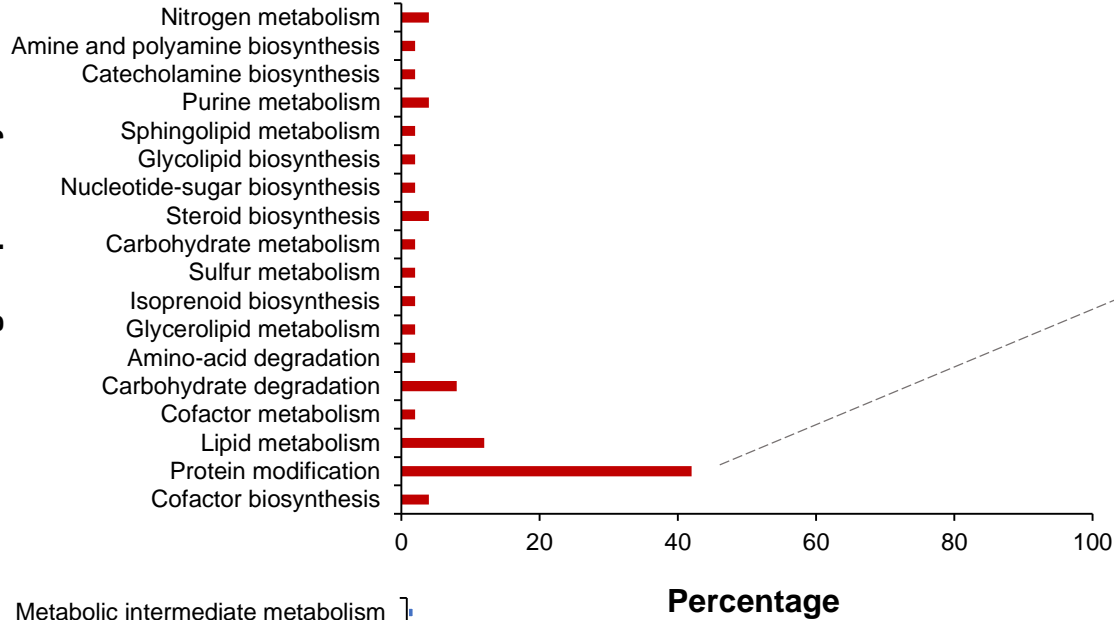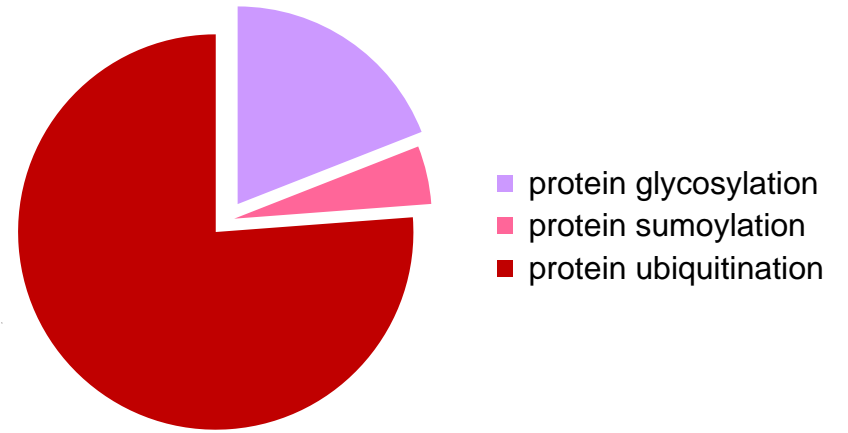

**WM1366**

**Biological pathways**

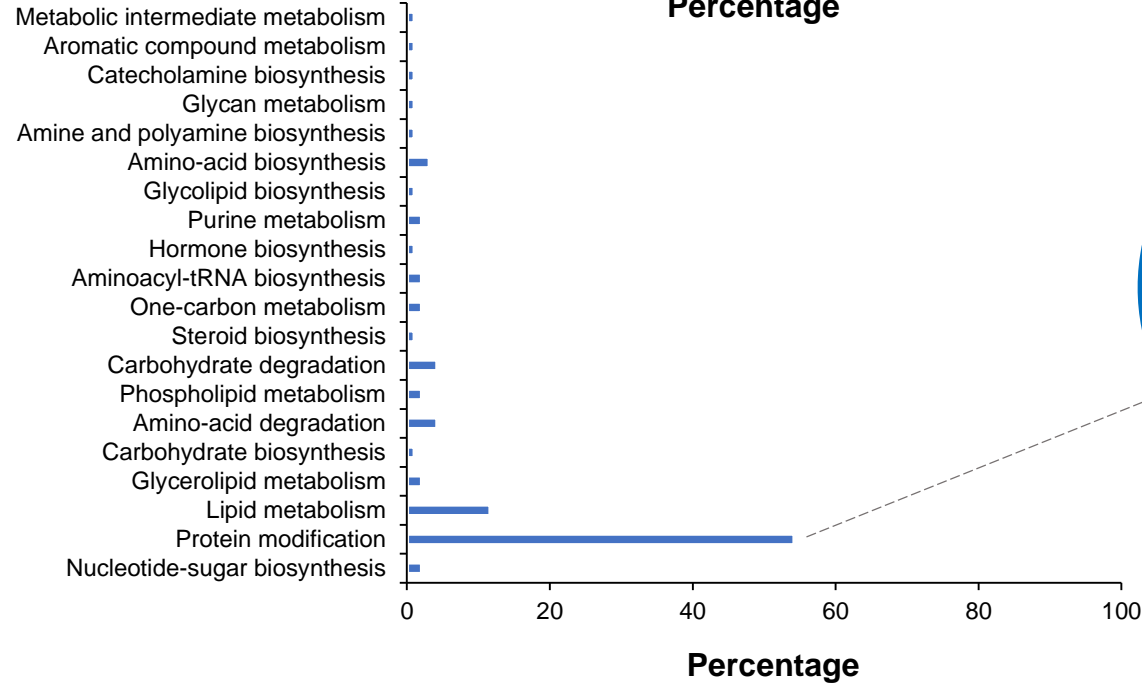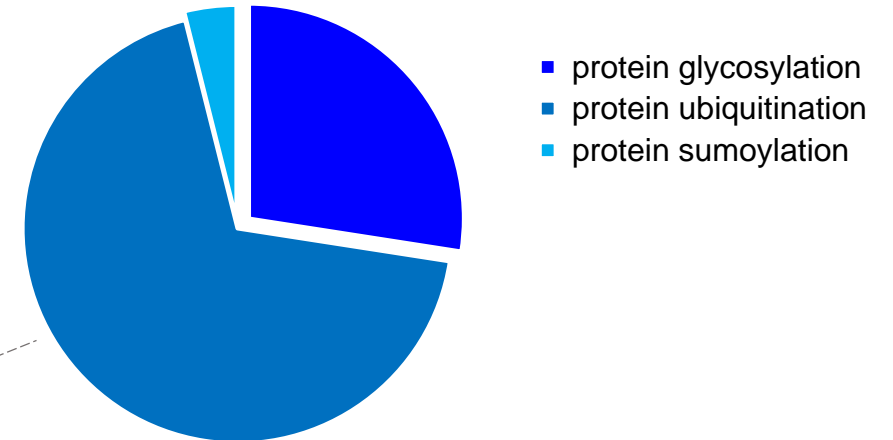

**Figure S4: Biological pathways of substrates identified by TAILS analysis in both cell lysates under culturing condition comprised by the mixture of hexoses (glucose + mannose 25 mM, final).**

**A**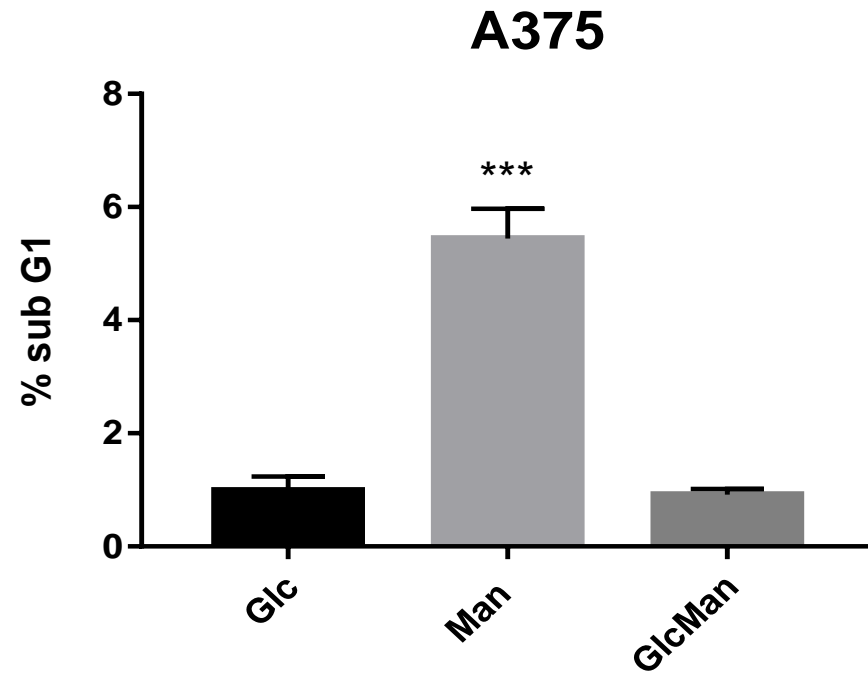**B**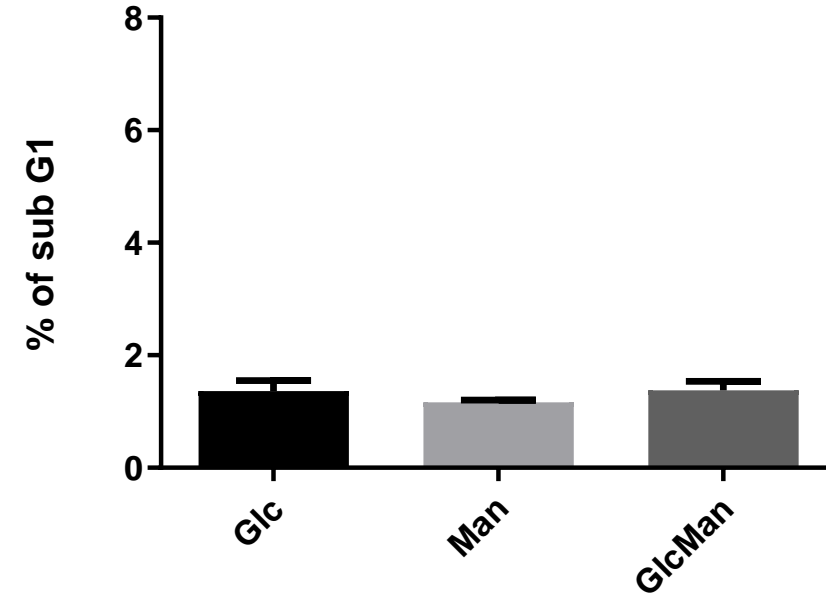

**Figure S5:** Mannose-induced cell death was evaluated by flow cytometry (as the percentage of cells in sub G1 phase of the cell cycle) after culturing A375 (**A**) or WM1366 (**B**) cells for 72h in media with glucose, mannose, or glucose + mannose (\*\*\*)  $p < 0.005$ ; ANOVA followed by Tukey test).
